# Supplementary material for: Lipase-Catalyzed Preparation and Optimization of Structured Phosphatidylcholine Containing Nervonic Acid
Source: MDPI journal article supplement (doi:10.3390/molecules29071539), 2024-03-29
Supplement: s1 [file s1]

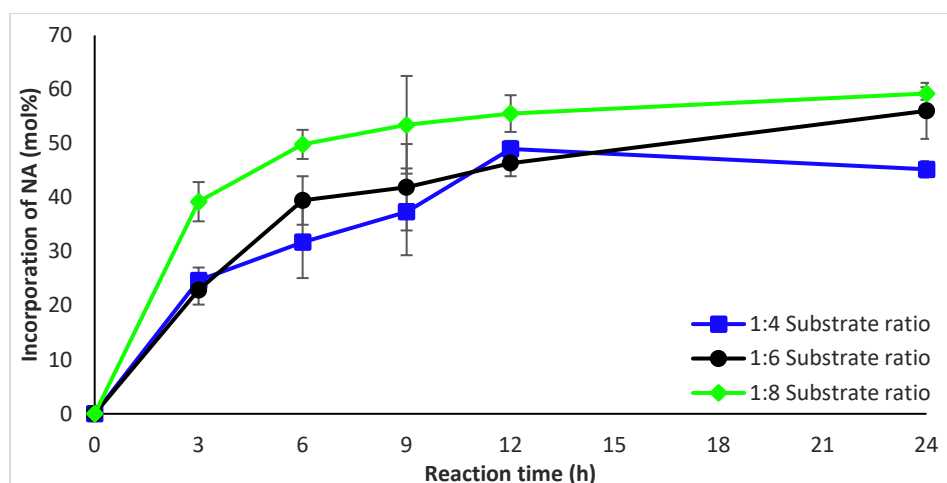

**Figure S1:** Incorporation of nervonic acid into phosphatidylcholine by acidolysis using phospholipase A<sub>1</sub> for 24 h. Substrate molar ratio used was 1:4, 1:6 and 1:8 (PC:NA mol:mol) for the experiments. Mean and standard deviation obtained from duplicate experiments.

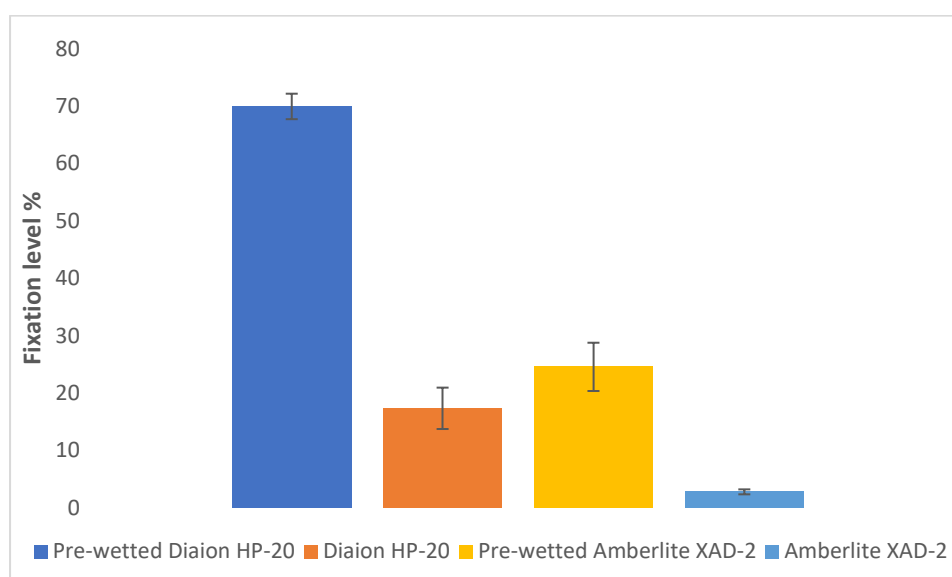

**Figure S2:** Fixation level (%) of phospholipase A<sub>1</sub> on pre-wetted and non-pre-wetted carriers.

**Table S1:** Oil extraction efficiency between enzymatic and solvent extraction

| Method               | Oil extracted (%) |
|----------------------|-------------------|
| Enzymatic extraction | 33.56 ± 3.5       |
| Solvent extraction   | 50.3 ± 4          |

Extraction were obtained from average of 4 samples.
